# Supplementary material for: Comparative validation of the D. melanogaster modENCODE transcriptome annotation
Source: HighWire-hosted journal article supplement (doi:10.1101/gr.159384.113), 2014-07-01
Supplement: Supplemental_Material.docx [file Supplemental_Material.docx]

**Supplemental materials**

**Comparative Analysis of the *D. melanogaster* modENCODE Transcriptome Annotation**

Zhen-Xia Chen1*, David Sturgill1*, Jiaxin Qu2, Huaiyang Jiang2, Soo Park3, Nathan Boley4, Ana Maria Suzuki5, Anthony R. Fletcher6, David C. Plachetzki7, Peter C. FitzGerald8, Carlo G. Artieri1, Joel Atallah7, Olga Barmina7, James B. Brown4, Kerstin P. Blankenburg2, Emily Clough1, Abhijit Dasgupta9,Sai Gubbala2, Yi Han2, Joy C. Jayaseelan2, Divya Kalra2, Yoo-Ah Kim10, Christie L. Kovar2, Sandra L. Lee2, Mingmei Li2, James D. Malley6, John H. Malone1, Tittu Mathew2, Nicolas R. Mattiuzzo1, Mala Munidasa2, Donna M. Muzny2, Fiona Ongeri2, Lora Perales2, Teresa M. Przytycka10, Ling-Ling Pu2, Garrett Robinson4, Rebecca L. Thornton2, Nehad Saada2, Steven E. Scherer2, Harold E. Smith1, Charles Vinson8,Crystal B. Warner2, Kim C. Worley2, Yuan-Qing Wu2, Xiaoyan Zou2, Peter Cherbas11, Manolis Kellis12, Michael B. Eisen13, Fabio Piano14, Karin Kionte14, David H. Fitch14, Paul W. Sternberg15, Asher D. Cutter16, Michael O. Duff17, Roger A. Hoskins3, Brenton R. Graveley17, Richard A. Gibbs2, Peter J. Bickel4, Artyom Kopp7, Piero Carninci5, Susan E. Celniker3, Brian Oliver1^, and Stephen Richards2

1National Institute of Diabetes and Digestive and Kidney Diseases, National Institutes of Health, 50 South Drive, Bethesda MD 20892, 2Human Genome Sequencing Center, Baylor College of Medicine, One Baylor Plaza, Houston TX 77030, 3Department of Genome Dynamics, Life Sciences Division, Lawrence Berkeley National Laboratory, Berkeley CA 94720, 4Department of Statistics, University of California, Berkeley CA 94720, 5Technology Development Group, RIKEN Omics Science Center, and RIKEN Center for Life Science Technologies, Division of Genomic Technologies Yokohama City, Kanagawa Japan 230-0045, 6Division of Computational Bioscience, Center For Information Technology, National Institutes of Health, 12 South Drive, Bethesda MD 20814, 7Department of Evolution and Ecology, University of California, One Shields Avenue, Davis CA 95616, 8National Cancer Institute, National Institutes of Health, Bethesda MD 20892, 9Clinical Trials and Outcomes Branch, National Institute of Arthritis and Musculoskeletal and Skin Diseases, National Institutes of Health, Bethesda MD 20892, 10National Center for Biotechnology Information, National Library of Medicine, National Institutes of Health, Bethesda, Maryland, 20892, 11Department of Biology, Indiana University, 1001 East 3rd Street, Bloomington IN 47405, 12Computer Science and Artificial Intelligence Laboratory, Massachusetts Institute of Technology, Cambridge MA 20139, 13Molecular and Cell Biology, University of California, Berkeley CA 94720, 14Department of Biology, New York University, New York, NY 10003, 15HHMI and Division of Biology, California Institute of Technology, Pasadena, California 91125, 16Department of Ecology and Evolutionary Biology, University of Toronto, Toronto, Canada, 17Department of Genetics and Developmental Biology, Institute for Systems Genomics, University of Connecticut Health Center, 400 Farmington Avenue, Farmington, Connecticut 06030-6403. * Equal contributors ^Corresponding author.

**CONTENTS**

**This file:**

Methods and references

Table S1: Sample and assembly information for new Drosophila genomes

Table S2: Matrix of patristic distances

Table S3: Summary of RNA-Seq sequencing depth

Table S4: Brief view and key to: Sample identifiers and accessions

Table S5: Brief view and key to: First CDS exon RPKM for each sample

Table S6: Brief view and key to: CDS exon validation and evolution

Table S7: Brief view and key to: UTR exon validation and evolution

Table S8: Brief view and key to: ncRNA exon validation and evolution

Table S9: Brief view and key to: Intron validation and evolution

Table S10: Brief view and key to: Intergenic validation and evolution

Table S11: DNA element validation totals and rates

Table S12: Brief view and key to: Promoter summary

Table S13: Brief view and key to: Splice junction validation and evolution

Table S14: RNA element validation totals and rates

Table S15: Brief view and key to: Splicing events

Table S16: Brief view and key to: RNA editing validation and evolution

Table S17: Expression of conserved intergenic regions.

File S1-8: Brief view and key to: CAGE peaks

**Separate data files:**

Table S4: Sample identifiers and accessions

Table S5: First CDS exon RPKM for each sample

Table S6: CDS exon validation and evolution

Table S7: UTR exon validation and evolution

Table S8: ncRNA exon validation and evolution

Table S9: Intron validation and evolution

Table S10: Intergenic validation and evolution

Table S12: Promoter summary

Table S13: Splice junction validation and evolution

Table S15: Splicing events

Table S16: RNA editing validation and evolution

File S1: CAGE peaks in *D. melanogaster* mixed-sex carcass

File S2: CAGE peaks in *D. melanogaster* ovary

File S3: CAGE peaks in *D. melanogaster* testis, replicate 1

File S4: CAGE peaks in *D. melanogaster* testis, replicate 2

File S5: CAGE peaks in *D. pseudoobscura* female carcass

File S6: CAGE peaks in *D. pseudoobscura* male carcass

File S7: CAGE peaks in *D. pseudoobscura* ovary

File S8: CAGE peaks *in D. pseudoobscura* testis

**Methods**

**Genomes**

*D. biarmipes*, *D. eugracilis*, *D. ficusphila*, *D. takahashii*, *D. elegans*, *D. rhopaloa*, *D. bipectinata*, and *D. kikkawai* were maintained on cornmeal media. Flies for these species were inbred by single pair, full-sib crosses for 10-18 generations (with the exception of *D. rhopaloa*, which did not tolerate inbreeding). All genome strains have been deposited in the San Diego (USA) and Ehime (Japan) *Drosophila* species stock centers.

We prepared shotgun genomic, 3kb paired-end, and 8kb paired-end libraries for sequencing on a GS FLX Titanium Genome Sequencer (Roche, Inc. Branford, CT). 3 and 8 kb 454 mate pair libraries were prepared according to the manufacturer’s protocol with modifications. 5 µg (15ug for 14kb) genomic DNA is sheared to 2-4 kb with a Covaris (Covaris, Inc. Woburn, MA) or to 14-18 kb by Hydroshear (Digilab INC, Holliston, MA). 14 kb mate pair fragments were further size selected on a 0.7% agarose gel. The DNA fragments were end-repaired (NEBNext End-Repair Module; Cat. No. E6050L), and LoxP adaptor ligated (NEBNext Quick Ligation Module Cat. No. E6056L). Nicked DNA was repaired by strand displacement with the *Bst* DNA Polymerase and the DNA fragments were quantitated. 100 ng (300 ng for 8 kb) size-selected fragments were circularized by Cre Recombinase (NEB, Cat No. M0298L), and any remaining linear molecules were removed by DNase/Exonuclease digestion. The circularized DNA fragments were sheared again by the Covaris (Covaris, Inc. Woburn, MA) to an average fragment length of 500 bp. After end repair, fragments containing the biotinylated junction linker from the circularized size-selected fragments were purified using streptavidin-coated magnetic beads (Invitrogen, Carlsbad, CA). These purified fragments were adapter ligated and PCR enriched. The library was size-selected using AMPure size exclusion beads (Beckman Coulter Genomics, Inc.; Cat. No. A63882). These dsDNA amplified molecules were immobilized once more on streptavidin-coated magnetic beads, and single-stranded Paired End DNA library was released by alkaline treatment, then neutralized and cleaned using MinElute PCR purification columns (Qiagen, Valencia, CA). All libraries were checked for quality on an Agilent 2100 Bioanalyzer (Santa Clara, CA) using an RNA Pico 6000 Lab Chip. Library concentrations were determined using a Quant-iT RiboGreen RNA Assay Kit (Life Technologies) and each library diluted to 108 molecules prior to sequencing.

A single-stranded 454 sequencing library was used as template for single-molecule emulsion PCR on 28-mm diameter beads. The amplified template beads were recovered after emulsion breaking and selective enrichment. The sequencing primer was annealed to the template and the beads were incubated with *Bst* DNA polymerase, apyrase and single-stranded binding protein. A slurry of the template beads, enzyme beads (required for signal transduction) and packing beads (for *Bst* DNA polymerase retention) was loaded into the wells of a picotiter plate, inserted in the flow cell and subjected to pyro-sequencing on the Genome Sequencer XLR Titanium instrument (Roche, Inc. Branford, CT). The XLR/Titanium Genome Sequencer flows 400 cycles of four solutions containing either dTTP, aSdATP, dCTP and dGTP reagents, in that order, over the cell. Each dNTP flow was imaged by a CCD (charge-coupled device) camera on the sequencer, and images were processed in real time to identify template-containing wells and to compute associated signal intensities. The images were further processed for chemical and optical cross-talk, phase errors and read quality before base calling was performed for each template bead.

We utilized Illumina technology to correct for any 454 homopolymer errors that may have otherwise been incorporated in the reference genome sequences. High molecular weight double strand genomic DNA samples were constructed into Illumina paired-end libraries according to the manufacturer’s protocol (Illumina Inc., San Diego, CA). Briefly, between 1 and 5 µg of genomic DNA in 100ul volume was sheared into fragments of approximately 300 base pairs with the Covaris S2 or E210 system (Covaris, Inc. Woburn, MA). The setting was 10% Duty cycle, Intensity of 4,200 Cycles per Burst, for 120 seconds. Fragments were processed through DNA End-Repair in 100 µl containing sheared DNA, 10 µl 10X buffer, 5µl End­Repair Enzyme Mix and H2O (NEBNext End-Repair Module; Cat. No. E6050L) at 20°C for 30 minutes; A-tailing was performed in 50 µl containing End-Repaired DNA, 5 µl 10X buffer, 3 µl Klenow Fragment (NEBNext dA-Tailing Module; Cat. No. E6053L) at 37°C for 30 minutes, each step followed by purification using a QIAquick PCR purification kit (Cat. No. 28106). Resulting fragments were ligated with Illumina PE adapters and the NEBNext Quick Ligation Module (Cat. No. E6056L). After ligation, size selection was carried out by using 2% low-melt agarose gel running in 1X TBE. Gel slices were excised from 290bp to 320bp and the size-selected DNA was purified using a Qiagen MinElute gel extraction kit and eluted in 30 µl EB buffer. PCR with Illumina PE 1.0 and 2.0 primers was performed in 25-μl reactions containing 12.5 µl of 2x Phusion High-Fidelity PCR master mix, 2.5 µl size-selected fragment DNA, 0.3 µl each primer and H2O. The standard thermocycling for PCR was 30 s at 98°C for the initial denaturation followed by 10 cycles of 10 s at 98°C, 30 s at 65°C and 30 s at 72°C and a final extension of 5 min. at 72°C. Agencourt® XP® Beads (Beckman Coulter Genomics, Inc.; Cat. No. A63882) were used to purify the PCR products. After Bead purification, PCR products were quantified using PicoGreen (Cat. No. P7589) and their size distribution analyzed using the Agilent Bioanalyzer 2100 DNA Chip 7500 (Cat. No. 5067-1506).

We sequenced 15 µl of 10 nM final library on Illumina’s Genome Analyzer IIx system according to the manufacturer’s specifications. Briefly, cluster generations were performed on an Illumina cluster station. 36-76 cycles of sequencing were carried out with each library in a separate, single flow cell lane on the Illumina GA II. Sequencing analysis was first done with Illumina analysis pipeline. Sequencing image files were processed to generate base calls and phred-like base quality scores and to remove low-quality reads.

We took a 454 based approach to assembling genome sequence for the newly reported species, generating approximately 20X fragment sequence, and 30X “clone” or mate pair coverage in 3 kb and 8 kb mate pairs. These data were assembled with the Celera CABOG assembler (version 6.1, 2010/03/22). Genomic sequence generated on the Illumina platform was then aligned to the draft genome assemblies [release 1 versions of new genomes [e.g. *D. biarmipes* (Dbia_1.0)], and used those reads to correct 454 homopolymer errors in the final references [release 2 versions of new genomes [e.g. *D. biarmipes* (Dbia_2.0)]. The average contig N50 of the eight assemblies was 206 kb and scaffold N50 of 1.1 Mb. Of the eight assemblies, *D. rhopaloa* in particular had the worst assembly statistics. This was likely due to the inability of this species to be inbred, and the large number of individuals used for DNA isolation must have resulted in considerable heterozygosity, a known problem in genome assembly ([Jones et al. 2004](#_ENREF_32)). These assemblies are draft genomes and may contain errors, so users should exercise caution when using these data. Typical errors in draft genome sequences include mis-assemblies of repeated sequences, collapses of repeated regions, and unmerged overlaps (e.g. due to polymorphisms) creating artificial duplications. However base accuracy in contigs (contiguous blocks of sequence) is usually very high with most errors near the ends of contigs.

**Phylogenetic analysis**

We conducted phylogenetic analysis of the twelve *Drosophila* species with previously published genome sequences ([Clark et al. 2007](#_ENREF_14)) plus the eight additional species sequenced for this project. We first aligned 250 loci that were included in the orthologous gene set used in a recent drosophilid phylogeny ([Obbard et al. 2012](#_ENREF_57)). Each of these loci was unavailable for one or more of the 20 species. We ranked all loci by the number of available taxa and retained 41 loci that were present for at least 75% of the species. Each locus was then aligned separately with the MUSCLE aligner ([Edgar 2004](#_ENREF_19)) and gap regions and regions of low alignment score were removed using the “automated” heuristic implemented in trimAL ([Capella-Gutierrez et al. 2009](#_ENREF_12)). Individual sequence alignments for each locus were concatenated using in-house perl scripts. Phylogenetic analysis of the total dataset (20 taxa, 41 loci, 63,254 nucleotide positions, ~18% missing data) was conducted using MrBayes 3.2 ([Ronquist et al. 2012](#_ENREF_67)) under the GTR+I+gamma model (estimated values of model parameters were: r(A<->C): 0.113; r(A<->G): 0.255; r(A<->T): 0.146; r(C<->G): 7.85E-2; r(C<->T): 0.326; r(G<->T): 8.134E-2; pi(A): 0.267; pi(C): 0.241; pi(G): 0.24; pi(T): 0.252; alpha: 1.246; pinvar : 0.294). Two Markov Chain Monte Carlo (MCMC) chains converged to stationarity (standard deviation of split frequencies = 0.000000) within 5x103 moves. Our phylogeny for the 20 *Drosophila* species is derived from the posterior distribution of topologies and branch lengths from 1x107 MCMC steps. In all subsequent analyses, we used the patristic distance between each pair or species (that is, the combined branch length separating these species on the phylogeny, expressed in substitutions per site (ss) estimated under the empirical nucleotide substitution model detailed above) as the measure of evolutionary divergence between these species.

We used a conversion benchmark of 0.016 substitutions per million years ([Sharp and Li 1989](#_ENREF_71)) to estimate ss from divergence times given in million years. To estimate half-life, we used the N0 and λ parameters in the exponential regression line y=N0e-λx for aligned and expressed elements where: y was the percent aligned and expressed for each element type in each non-*melanogaster* species; x was phylogenetic distance from *D. melanogaster*; N0 was the percent of aligned and expressed elements in *D. melanogaster*; and λ was the decay constant of percent aligned and expressed. Half-life was where percent aligned and expressed fell to N0/2.

Whole-genome alignments between *D. melanogaster* and other species were performed using lastz ([Harris 2007](#_ENREF_27)) according to UCSC Genome Browser manual pages ([Meyer et al. 2012](#_ENREF_52)). Briefly, genomic sequences from each non-*melanogaster* species were split into 5 MB segments with *faSplit* (parameters: size -oneFile 5000000 -extra=10000), and pairwise alignment was performed against *D. melanogaster* with *lastz* (parameters: --masking=50 --hspthresh=2200 --ydrop=3400 --gappedthresh=4000 --inner=2000). These alignments were converted to Pattern Space Layout (PSL) format and lifted to chromosomes with *lavToPsl* and *liftUp*. PSL alignments were chained with *axtChain* (parameters: -linearGap=medium -psl), combined with *chainMergeSort* and *chainSplit*, and converted to alignment nets with the *chainNet*. Based on alignment nets, liftOver chain files that convert annotations from *D. melanogaster* to other species were created with the *netChainSubset* executable.

We also used the UCSC genome browser liftover software ([Kent et al. 2002](#_ENREF_35)), with alignment output in the form of liftover chain files, to project *D. melanogaster* annotation coordinates from modENCODE *D. melanogaster* transcriptome annotation version 2 (MDv2; ftp://encodeftp.cse.ucsc.edu/users/akundaje/fly/transcription/) to the reference genome of each other species. FlyBase r5.45 annotation (ftp.flybase.net) was used as the baseline to identify elements that represent novel annotations. Aligned regions that spanned less than half, or more than double, the range of MDv2 annotated exons in *D. melanogaster*, including CDS, UTR and ncRNA exons, were removed to exclude low confidence conversions. We also aligned introns and intergenic regions of *D. melanogaster* with the same criteria as exons. Introns that have overlap with any exons were excluded. Intergenic regions are the complement to all genes, exons and introns. Intergenic regions shorter than RNA-Seq reads (75 nt) were excluded. We lifted-over a 20bp region around the splice junction, and required presence and correct positioning of the donor and acceptor motifs in the test species as present in *D. melanogaster*. For A-I editing site alignments, we lifted over the single base position that is edited in *D. melanogaster*, and required the base of the aligned region in the query genome to be “A” or “T”.

**Exons**

All RNA-seq protocols are found in the GEO entries. We analyzed all exons defined in the MDv2 annotation. For exons including the translation initiator or transcription termination site, the UTR segments were defined as “UTR exons” and the coding segments were grouped with “CDS exons.” Gene models with no coding regions were defined as “ncRNA exons”. Introns and intergenic regions show no overlap with transcript exons.

All expression and comparative analysis was performed from the same set of alignments. To obtain alignments, RNA-Seq reads were trimmed to 75nt using shell scripts with the *cut* command. Trimmed reads were uniquely-mapped (-g 1 -r 150 --solexa1.3-quals) to respective genomes using TopHat 2 (v2.0.3) ([Trapnell et al. 2009](#_ENREF_82); [Trapnell et al. 2012](#_ENREF_83)). We estimated expression of aligned elements in each sample (See Table S4 for identifiers) by quantifying reads that map within the relevant regions, and intersecting coordinates with RNA-Seq read alignments using the *coverageBed* (v2.7.1) command in BedTools ([Quinlan and Hall 2010](#_ENREF_64)). Raw coverage results were used for validation. We used read coverage as a criterion of validation of exons. Specifically, any exon was validated in a species if 95% of all the bases of its aligned region on *coverageBed* output using custom shell scripts had at least 1x coverage in at least one non *D. melanogaster* sample (Tables S6-S8). We applied the same criterion to introns and intergenic regions (Table S9-S10). Intergenic regions that had overlap with CAGE sites and K27Ac3 modifications were extracted by bedtools intersect. H3K27Ac annotation is based on E0-4_H3K27Ac-Set2_merged_dcc.gff from [www.modencode.org](http://www.modencode.org) (accessible through DCC ID: modENCODE 970) ([Negre et al. 2011](#_ENREF_55)).

For abundance comparisons between samples and between species, normalized expression measures in the form of reads per kilobase per million mapped reads (RPKM) were generated by quantifying reads mapped within the exon, dividing by exon length, and dividing by the total number of mapped reads in millions. The non-redundant set of first coding exons in *D. melanogaster* annotation were sometimes used to minimize any bias in expression measurement due to incomplete gene models as indicated. Transcript profiles for all samples are provided in Table S5. Clustering of expression values was performed with the *heatmap.2* command in the *gplots* package ([Bolker et al. 2012](#_ENREF_9)), which performs hierarchical clustering via the *hclust* command. For samples with multiple replicates, the first replicate is presented, although using either replicate produced identical clustering.

To determine an RPKM threshold for detection above background, we quantified expression in intergenic space to estimate a cutoff RPKM (CR). We took p as the probability that a nonfunctional element is aligned to, and expressed in, a certain sample from a non-*melanogaster* species. Thus, the probability, which is also false positive rate, that a nonfunctional element is aligned to and expressed in any of the 75 samples is PN=1-(1-p)75. To avoid 95% false positives (PN<0.05), no more than 0.068% (p <0.068%) of nonfunctional elements may have expression over CR. We split intergenic regions into 200 nt bins with 100 nt overlap to normalize for exon length (median = 201 nt). We defined “nonfunctional” intergenic regions as those that were aligned to, but not expressed (> 95% element coverage) in any non-*melanogaster* sample (N = 190,232 intergenic bins). These intergenic bins may have 75N aligned regions in non-*melanogaster* samples at most, while 9,228,499 (64.682%) aligned regions were not found. If nonfunctional elements are expressed randomly, their aligned regions should have a similar distribution of RPKM in non-*melanogaster* samples as in *D. melanogaster* samples. Therefore, we estimated CR based on the expression of nonfunctional regions in *D. melanogaster* samples. We investigated distribution of RPKM of intergenic bins in 6 *D. melanogaster* samples, and set CR = 1.47, as only 0.193% (0.068%/(1-64.682%)) of them have RPKM > 1.47.

**Gene-level expression**

To analyze gene expression within *D. melanogaster*, we used the calculated abundance estimates from complete MDv2 gene models with Cufflinks ([Trapnell et al. 2012](#_ENREF_83)). We used the Cuffdiff command (version 2.0.2), supplying the MDv2 annotation and alignment files for *D. melanogaster* adults, with females as sample 1 and males as sample 2. We used upper quartile normalization and required Cuffdiff to report values for high abundance features (parameters -N --max-bundle-frags 2000000).

**TSS**

Total RNA for *D. melanogaster* CAGE-Seq from dissected testis and ovary of *D. melanogaster* wasprepared as previously described ([Hoskins et al. 2011](#_ENREF_30)). RNA samples for *D. pseudoobscura* for CAGE experiments were the same as those used in RNA-Seq. CAGE libraries were prepared for sequencing on the Illumina platform as described ([Takahashi et al. 2012](#_ENREF_77)) and sequenced (Illumina GAIIx) to generate 36 nt reads. Barcode sequence was trimmed and the 27 nt CAGE reads were aligned to the *D. pseudoobscura* genome using StatMap (http://www.statmap-bio.org/) and represented as a 1 bp CAGE site. We retained CAGE sites with >1 tag per million (TPM). To compare orthologous TSSs, we used the translation start sites of 1:1 orthologs of *D. melanogaster* and *D. pseudoobscura* from OrthoDB version 6 ([Waterhouse et al. 2013](#_ENREF_85)) (parsed from ftp://cegg.unige.ch/OrthoDB6/OrthoDB6_Drosophila_tabtext.gz). We associated CAGE sites with the nearest downstream gene AUG codon within 5kb because >90% of previously annotated *D. melanogaster* TSSs were within 5kb of the nearest AUG.

For motif analysis we selected the CAGE site with the greatest tag frequency for each gene (File S1-File S8). We used Random Forests (RF) ([Breiman 2001](#_ENREF_11); [Malley et al. 2011](#_ENREF_48); [Malley et al. 2012](#_ENREF_47)), Additional details on RF can be found at http://stat-www.berkeley.edu/users/breiman/RandomForests/cc_home.htm (Leo Breiman and Adele Cutler). *seqLogo v.1.2* ([Bembom 2012](#_ENREF_6)) and K-means clustering to examine regions flanking CAGE sites for motifs. We used the selected CAGE sites upstream of orthologs as true sites for probability machines and CAGE sites in the last exons of genes (regardless of TPM) were taken as nulls. RF was applied to each sample type separately. All machines were trained on bootstrap draws and data sent to the machines was pre-balanced (100 resamples to train 100 RF machines, each with 1,000 trees). The "features" used as input to RF were tetramers, situated at each position of the 500nt segment (256 different tetramers per position). RF used tetramers and position separately to make splits at the nodes in its tree building. The position importance ranking from RF was stable across all samples and centered on the adjusted CAGE peak +1 position. Across all the trees in any forest, those terminal nodes where a declaration was made for each training instance of 80% or more for "true" was considered predictive. Analysis was performed in R with the *randomForest* package ([Liaw and Wiener 2002](#_ENREF_40)).

**RNA elements**

Quantification of splice junction coverage, and other splicing analysis described below, was performed with the Splicing Analysis Toolkit (Spanki) v.0.4.0 (http://www.cbcb.umd.edu/software/spanki and https://github.com/dsturg/Spanki). Briefly, this program analyzes splicing at the junction level, by calculating read coverage over splice junctions and over exon-intron boundaries. Pairwise splicing events are defined from annotation using the AStalavista tool ([Sammeth et al. 2008](#_ENREF_69)), parsed into their component splice junctions, and quantified using junction coverage. Coverage over junctions and estimates for intron retention, based on reads that span the exon-intron boundary, was performed with the *spankijunc* utility, using RNA-Seq alignment files as input. Qualitative analysis of splice junctions, including identification of donor/acceptor motifs, was performed with the *annotate_junctions* utility with transcript model annotation as input. Alternative splicing was quantified from junction coverage using the Percent Spliced In (PSI) metric, defined as the junction coverage of the inclusion form divided by the sum of the junction coverage of the inclusion and exclusion forms, normalizing each value by the number of sites. Calculations of PSI in non-*melanogaster* species were made using orthologous junctions identfied by alignment. For individual junctions, our minimum criterion for validation is one junction-spanning read in any non-*melanogaster* RNA-Seq sample. Validation results for splice junctions in each species are given in Table S13.

For the validation of aligned editing sites, we extracted the base calling at the aligned editing sites with the *mpileup* command in samtools(v.0.1.18) ([Li et al. 2009](#_ENREF_38)), and compared them with the reference bases. Reads where base calling of the site is “G” and reference is “A”, or base calling of the site is “C” and reference is “T” were taken as evidence of editing, base calling that is the same as reference bases were taken as reference match, and other reads were excluded. We required at least two mapped reads, accounting for at least 5% of mapped reads at the aligned site, in at least one sample to show evidence of editing (ignoring direction in non-strand-specific reads), and at least 10 mapped reads with reference match. Complete validation results for editing sites are provided in Table S16.

**Informatics and statistics**

All statistical computation was performed in the R software environment ([R Core Team 2012](#_ENREF_65)). Correlation (Pearson and Spearman) was calculated using the *cor* command in the stats package ([R Core Team 2012](#_ENREF_65)). Visualizations of read coverage were generated by loading BAM files into the Integrative Genomics Viewer (IGV) v.2.1 ([Thorvaldsdottir et al. 2012](#_ENREF_81)). Sequence alignments were visualized using Jalview v.2.7 ([Waterhouse et al. 2009](#_ENREF_84)).

Table S1: Sample and assembly information for new *Drosophila* genomes

| *Species* | *Dbia* | *Dbip* | *Dele* | *Deug* | *Dfic* | *Dkik* | *Drho* | | *Dtak* |
| --- | --- | --- | --- | --- | --- | --- | --- | --- | --- |
| *General Info* | | | | | | | | | |
| *Stock Number* | 14023-0361.10 | 14024-0381.19 | 14027-0461.03 | 14026-0451.10 | 14025-0441.05 | 14028-0561.14 | 14029-0021.01 | 14022-0311.13 | |
| *NCBI BioProject* | 62307 | 62313 | 62315 | 67709 | 62317 | 62319 | 67665 | 62321 | |
| *Inbreeding Generations* | 11 | 18 | 11 | 11 | 10 | 10 | 0 | 13 | |
| *Strain* | 14023-0361.00 | 14024-0381.03 | HK | KB1 | 14025-0441.00 | 14028-0561.00 | BaVi067 | 14022-0311.05 | |
| *Collection location* | Ari Ksatr, Cambodia | Chia-I, Taiwan | Hong Kong, China | Kuala Belalong, Brunei | Taiwan | Caroline Island, Colombia | Vietnam | Yun Shui, Taiwan | |
| *Collection Year* | 1967 | 1967 | unknown | 2002 | 1961 | unknown | unknown | 1968 | |
| *Collector or Donor* | M. Delfinado | unknown | John True | Artyom Kopp | unknown | Marvin Wasserman | Hisaki Takamori | Lynn Throckmorton | |
| *Sequence Generation and Coverage* | | | | | | | | | |
| Fragment | 18.3M  (24.2X) | 18.7M (24.4X) | 18.0M (23.3X) | 17.1M (24.9X) | 16.3M (23.9X) | 14.2M (21.5X) | 11.4M (20.2X) | | 18.9M (22.5X) |
| 3kb | 9.7M (8.6X) | 8.6M  (9.7X) | 8.6M (10.7X) | 9.0M (12.8X) | 8.3M (10.1X) | 10.5M (10.0X) | 4.8M (8.3X) | | 10.5M (11.7X) |
| 8kb | 3.0M (2.4X) | 2.0M  (2.2X) | 3.1M (2.7X) | 2.6M (3.0X) | 1.9M  (2.1X) | 3.3M (2.7X) | 1.2M (1.9X) | | 2.3M  (2.3X) |
| Total | 31.0M (35.2X) | 29.3M (36.3X) | 29.7M (36.7X) | 28.7M (40.7X) | 26.5M (36.1X) | 28.0M (34.2X) | 17.4M (30.4X) | | 31.7M (31.7X) |
| *Assembly Statistics* | | | | | | | | | |
| *Contig N50* | 436 kb | 149 kb | 214 kb | 224 kb | 276 kb | 209 kb | 19 kb | | 125 kb |
| *Scaffold N50* | 3,128 kb | 663 kb | 1,714 kb | 977 kb | 1,049 kb | 911 kb | 45 kb | | 390 kb |
| *Assembled bases* | 180 Mb | 166 Mb | 171 Mb | 156 Mb | 151 Mb | 163 Mb | 195 Mb | | 181 Mb |

Table S2: Matrix of patristic distances.

|  | *Dana* | *Dbia* | *Dbip* | *Dele* | *Dere* | *Deug* | *Dfic* | *Dgri* | *Dkik* | *Dmel* | *Dmoj* | *Dper* | *Dpse* | *Drho* | *Dsec* | *Dsim* | *Dtak* | *Dvir* | *Dwil* | *Dyak* |
| --- | --- | --- | --- | --- | --- | --- | --- | --- | --- | --- | --- | --- | --- | --- | --- | --- | --- | --- | --- | --- |
| *Dana* | 0.00 | 0.57 | 0.13 | 0.54 | 0.63 | 0.61 | 0.60 | 1.02 | 0.56 | 0.62 | 1.12 | 0.69 | 0.69 | 0.54 | 0.62 | 0.62 | 0.57 | 1.01 | 1.02 | 0.62 |
| *Dbia* | 0.57 | 0.00 | 0.58 | 0.28 | 0.31 | 0.29 | 0.32 | 0.96 | 0.44 | 0.30 | 1.05 | 0.63 | 0.63 | 0.27 | 0.30 | 0.30 | 0.19 | 0.95 | 0.96 | 0.30 |
| *Dbip* | 0.13 | 0.58 | 0.00 | 0.55 | 0.63 | 0.61 | 0.60 | 1.02 | 0.57 | 0.63 | 1.12 | 0.70 | 0.70 | 0.54 | 0.63 | 0.62 | 0.58 | 1.02 | 1.02 | 0.63 |
| *Dele* | 0.54 | 0.28 | 0.55 | 0.00 | 0.33 | 0.31 | 0.30 | 0.93 | 0.41 | 0.33 | 1.02 | 0.60 | 0.60 | 0.17 | 0.33 | 0.32 | 0.28 | 0.92 | 0.93 | 0.33 |
| *Dere* | 0.63 | 0.31 | 0.63 | 0.33 | 0.00 | 0.32 | 0.37 | 1.01 | 0.49 | 0.12 | 1.11 | 0.69 | 0.68 | 0.33 | 0.12 | 0.12 | 0.31 | 1.01 | 1.01 | 0.10 |
| *Deug* | 0.61 | 0.29 | 0.61 | 0.31 | 0.32 | 0.00 | 0.35 | 0.99 | 0.47 | 0.32 | 1.09 | 0.67 | 0.66 | 0.31 | 0.32 | 0.31 | 0.29 | 0.99 | 0.99 | 0.32 |
| *Dfic* | 0.60 | 0.32 | 0.60 | 0.30 | 0.37 | 0.35 | 0.00 | 0.98 | 0.46 | 0.36 | 1.08 | 0.66 | 0.66 | 0.30 | 0.36 | 0.36 | 0.31 | 0.98 | 0.98 | 0.37 |
| *Dgri* | 1.02 | 0.96 | 1.02 | 0.93 | 1.01 | 0.99 | 0.98 | 0.00 | 0.94 | 1.01 | 0.51 | 0.86 | 0.86 | 0.92 | 1.00 | 1.00 | 0.96 | 0.41 | 0.88 | 1.01 |
| *Dkik* | 0.56 | 0.44 | 0.57 | 0.41 | 0.49 | 0.47 | 0.46 | 0.94 | 0.00 | 0.49 | 1.04 | 0.62 | 0.62 | 0.40 | 0.48 | 0.48 | 0.44 | 0.94 | 0.94 | 0.49 |
| *Dmel* | 0.62 | 0.30 | 0.63 | 0.33 | 0.12 | 0.32 | 0.36 | 1.01 | 0.49 | 0.00 | 1.10 | 0.68 | 0.68 | 0.32 | 0.05 | 0.05 | 0.30 | 1.00 | 1.01 | 0.12 |
| *Dmoj* | 1.12 | 1.05 | 1.12 | 1.02 | 1.11 | 1.09 | 1.08 | 0.51 | 1.04 | 1.10 | 0.00 | 0.96 | 0.96 | 1.02 | 1.10 | 1.10 | 1.05 | 0.37 | 0.98 | 1.11 |
| *Dper* | 0.69 | 0.63 | 0.70 | 0.60 | 0.69 | 0.67 | 0.66 | 0.86 | 0.62 | 0.68 | 0.96 | 0.00 | 0.01 | 0.60 | 0.68 | 0.68 | 0.63 | 0.86 | 0.86 | 0.68 |
| *Dpse* | 0.69 | 0.63 | 0.70 | 0.60 | 0.68 | 0.66 | 0.66 | 0.86 | 0.62 | 0.68 | 0.96 | 0.01 | 0.00 | 0.60 | 0.68 | 0.68 | 0.63 | 0.86 | 0.86 | 0.68 |
| *Drho* | 0.54 | 0.27 | 0.54 | 0.17 | 0.33 | 0.31 | 0.30 | 0.92 | 0.40 | 0.32 | 1.02 | 0.60 | 0.60 | 0.00 | 0.32 | 0.32 | 0.27 | 0.92 | 0.92 | 0.32 |
| *Dsec* | 0.62 | 0.30 | 0.63 | 0.33 | 0.12 | 0.32 | 0.36 | 1.00 | 0.48 | 0.05 | 1.10 | 0.68 | 0.68 | 0.32 | 0.00 | 0.02 | 0.30 | 1.00 | 1.00 | 0.12 |
| *Dsim* | 0.62 | 0.30 | 0.62 | 0.32 | 0.12 | 0.31 | 0.36 | 1.00 | 0.48 | 0.05 | 1.10 | 0.68 | 0.68 | 0.32 | 0.02 | 0.00 | 0.30 | 1.00 | 1.00 | 0.12 |
| *Dtak* | 0.57 | 0.19 | 0.58 | 0.28 | 0.31 | 0.29 | 0.31 | 0.96 | 0.44 | 0.30 | 1.05 | 0.63 | 0.63 | 0.27 | 0.30 | 0.30 | 0.00 | 0.95 | 0.96 | 0.30 |
| *Dvir* | 1.01 | 0.95 | 1.02 | 0.92 | 1.01 | 0.99 | 0.98 | 0.41 | 0.94 | 1.00 | 0.37 | 0.86 | 0.86 | 0.92 | 1.00 | 1.00 | 0.95 | 0.00 | 0.88 | 1.00 |
| *Dwil* | 1.02 | 0.96 | 1.02 | 0.93 | 1.01 | 0.99 | 0.98 | 0.88 | 0.94 | 1.01 | 0.98 | 0.86 | 0.86 | 0.92 | 1.00 | 1.00 | 0.96 | 0.88 | 0.00 | 1.01 |
| *Dyak* | 0.62 | 0.30 | 0.63 | 0.33 | 0.10 | 0.32 | 0.37 | 1.01 | 0.49 | 0.12 | 1.11 | 0.68 | 0.68 | 0.32 | 0.12 | 0.12 | 0.30 | 1.00 | 1.01 | 0.00 |

Table S3: Summary of RNA-Seq sequencing depth

|  | Number of mapped RNA-Seq reads (millions) | | | | | | | | | | Reads mapping to aligned *Dmel* sequence (%) | | | | |
| --- | --- | --- | --- | --- | --- | --- | --- | --- | --- | --- | --- | --- | --- | --- | --- |
| Species | Adult Female | Adult Male | Ovary | Testis | Female Carcass | Male Carcass | Female Head | Male Head | Mixed Embryo | Total | CDS exons | UTR exons | ncRNA exons | introns | Inter-genic |
| *Dmel* | 96.2 | 103.4 | - | - | - | - | 11.4 | 9.1 | - | 220.0 | 64.32 | 21.39 | 25.86 | 3.34 | 1.08 |
| *Dsim* | 151.7 | 172.0 | 167.9 | 114.9 | 173.7 | 60.8 | - | - | - | 807.1 | 46.57 | 18.56 | 0.91 | 1.63 | 0.38 |
| *Dyak* | 91.8 | 96.5 | - | - | - | - | - | - | - | 188.3 | 68.42 | 22.71 | 0.86 | 2.30 | 0.49 |
| *Deug* | 60.1 | 51.6 | - | - | - | - | - | - | 201.6 | 313.3 | 49.16 | 17.99 | 0.88 | 0.98 | 0.26 |
| *Dbia* | 56.9 | 58.8 | - | - | - | - | - | - | 196.8 | 312.5 | 40.34 | 15.29 | 0.37 | 0.84 | 0.12 |
| *Dtak* | 49.4 | 52.3 | - | - | - | - | - | - | 197.1 | 298.8 | 35.33 | 17.40 | 0.27 | 0.74 | 0.18 |
| *Dfic* | 81.2 | 78.8 | - | - | - | - | - | - | 200.5 | 360.4 | 45.18 | 17.05 | 0.28 | 0.76 | 0.13 |
| *Dele* | 50.2 | 48.8 | - | - | - | - | - | - | 297.8 | 396.7 | 53.82 | 19.44 | 0.48 | 1.35 | 0.25 |
| *Drho* | 45.4 | 59.4 | - | - | - | - | - | - | 192.3 | 297.2 | 50.17 | 18.96 | 0.27 | 0.82 | 0.13 |
| *Dkik* | 34.2 | 47.2 | - | - | - | - | - | - | 168.6 | 250.0 | 41.82 | 10.12 | 0.18 | 0.38 | 0.16 |
| *Dana* | 92.1 | 76.8 | - | - | - | - | - | - | - | 168.9 | 51.26 | 9.69 | 0.53 | 0.41 | 0.02 |
| *Dbip* | 37.1 | 45.4 | - | - | - | - | - | - | 258.8 | 341.3 | 58.78 | 13.71 | 0.19 | 0.60 | 0.05 |
| *Dpse* | 133.3 | 112.8 | 357.5 | 350.9 | 250.3 | 282.5 | 11.7 | 16.7 | - | 1515.9 | 50.03 | 9.27 | 0.78 | 0.40 | 0.02 |
| *Dmoj* | 92.6 | 101.9 | - | - | - | - | 21.1 | 30.5 | - | 246.1 | 56.69 | 7.11 | 0.09 | 0.33 | 0.01 |
| *Dvir* | 130.3 | 80.0 | - | - | - | - | - | - | - | 210.3 | 39.43 | 4.63 | 0.40 | 0.27 | 0.01 |

###### Table S4: Sample_identifiers and accessions.

Key to headers for data file: Table_S4_sample_identifiers.xls. Species, strain, developmental stage, sex, tissue, and biological replicate are given for each sample. Information for the Gene Expression Ominibus (GEO) entries are given, including the sample ID and the sample accession. There are rows for each sample, with Dana_371.13_F_R1 as an example.

Example:

| Sample_ID | Species | Strain | Stage | Sex | Tissue | Replicate | GEO_sampleID | GEO_accession |
| --- | --- | --- | --- | --- | --- | --- | --- | --- |
| Dana_371.13_F_R1 | *D. ananassae* | 14024-0371.13 | Adult | Female | Whole | 1 | Whole_Dana_371.13_Female_Rep1 | GSM694275 |
| ... all samples |  |  |  |  |  |  |  |  |

Table S5: First CDS exon RPKM for each sample

Key to headers for data file: Table_S5_first_CDS_RPKM.xls.Matrix of all RPKM values for first coding exons for orthologs in all samples, showing the MDv2 Id, chromosome location, nt start and stop positions, and strand. There are columns for each sample, with Dana_371.13_F_R1 shown as an example. There are rows for each MDv2 element.

Example:

| Id | chrom | start (1-based) | end(1-based) | strand | Dana_371.13_F_R1 | .. *all samples* |
| --- | --- | --- | --- | --- | --- | --- |
| mdcds_1 | chr2L | 10004047 | 10004126 | + | 48.7389 | .. |
| … *all exons* | … | … | … | … | … | .. |

Table S6: CDS exon validation and evolution (Table_S6_CDS_exon_validation.xls).

Key to validation results for CDS exons in the MDv2 annotation. Unique identifier for event (Id), chromosome arm (chrom), element starting and ending position in the genome (1-based coordinates), strand, conservation index (CI) are shown. There are columns for each sample, with Dana_371.13_F_R1 shown as an example. RPKMs are given for elements that are aligned and expressed (#s). No RPKMs are given for elements not aligning with the *Dmel* element (NA) or showing <95% coverage (LC). There are rows for each MDv2 element.

Example:

| Id | chrom | start (1-based) | end(1-based) | strand | CI | Dana_371.13_F_R1 | .. *all samples* |
| --- | --- | --- | --- | --- | --- | --- | --- |
| mdcds_1 | chr2L | 10004047 | 10004126 | + | 6.622 | 48.7389 | .. |
| *.. all exons* | … | … | … | … | … | … | .. |

Table S7: UTR exon validation and evolution (Table_S7_UTR_validation.xls).

See Table S7 for key.

Example:

| id | chrom | start (1-based) | end(1-based) | strand | CI | Dana_371.13_F_R1 | .. *all samples* |
| --- | --- | --- | --- | --- | --- | --- | --- |
| mdutr_1 | chr2L | 10001429 | 10001433 | - | 3.405 | 28.8823 | .. |
| *.. all exons* | … | … | … | … | … | … | .. |

Table S8: ncRNA exon validation and evolution (Table_S8_ncRNA_validation.xls).

See Table S7 for key.

Example:

| id | chrom | start (1-based) | end(1-based) | strand | CI | Dana_371.13_F_R1 | .. *all samples* |
| --- | --- | --- | --- | --- | --- | --- | --- |
| mdncRNA_1 | chr2L | 10862194 | 10862734 | - | 0 | NA | .. |
| .. *all exons* | … | … | … | … | … | … | .. |

Table S9: Intron validation and evolution (Table_S9_intron_validation.xls)

Expression results for introns in MDv2 annotation that do not overlap exons. See Table S7 for key.

Example:

| id | chrom | start (1-based) | end(1-based) | strand | CI | Dana_371.13_F_R1 | .. *all samples* |
| --- | --- | --- | --- | --- | --- | --- | --- |
| mdintron_14 | chr2L | 10006418 | 10006474 | + | 2.432 | LC | .. |
| … *all exons* | … | … | … | … |  | … | .. |

Table S10: Intergenic validation and evolution (Table_S10_intergenic_validation.xls)

Expression results for regions that do not overlap gene models. See Table S7 for key.

Example:

| id | chrom | start (1-based) | end(1-based) | strand | CI | Dana_371.13_F_R1 | .. *all samples* |
| --- | --- | --- | --- | --- | --- | --- | --- |
| mdintergenic_1 | chr2L | 1 | 7409 | . | 0 | NA | .. |
| … *all exons* | … | … | … | … |  | … | .. |

Table S11: DNA element validation totals and rates.

| MDv2 annotation  DNA elements | | % validated[[1]](#footnote-1) at distance (ss) from *Dmel* | | | | Parameters[[2]](#footnote-2) | | | t1/2[[3]](#footnote-3) | |
| --- | --- | --- | --- | --- | --- | --- | --- | --- | --- | --- |
| Type | # | >0.05 | >0.30 | >0.60 | N0 | | λ | R2 | Myrs[[4]](#footnote-4) | ss |
| CDS exon | 62,210 | 98.2 | 96.6 | 88.5 | 95.6 | | 0.3 | 0.87 | 128.9 | 2.06 |
| ncRNA exon | 1,816 | 61.7 | 47.4 | 30.9 | 46.8 | | 1.2 | 0.86 | 36.0 | 0.58 |
| Intron | 43,443 | 51.7 | 36.3 | 19.2 | 32.6 | | 1.8 | 0.81 | 24.1 | 0.39 |
| UTR exon | 64,955 | 86.3 | 73.1 | 36.5 | 76.2 | | 1.9 | 0.98 | 22.6 | 0.36 |
| Intergenic | 10,995 | 15.3 | 10.8 | 2.6 | 9.8 | | 2.9 | 0.87 | 14.8 | 0.24 |

Table S12: Promoter summary (Table_S12_promoter_summary.xls).

Key to promoter analysis. Chromosome arm (chr), element starting and ending position in the genome (0-based coordinates), strand, the orthoDB ID for the protein-coding gene following the CAGE peak (orthoid), tags per million tags sequenced (TPM), the distance between the CAGE peak and first ATG of the CDS (Dist_AUG), promoter motif group type (Promoter_group), and the sample type (sample) are shown. There are rows for each CAGE peak.

| chr | start | end | strand | orthoid | TPM | Dist_AUG | Promoter group | sample |
| --- | --- | --- | --- | --- | --- | --- | --- | --- |
| chr2L | 67043 | 67044 | + | EOG6STSR2 | 4.01058 | 581 | a | Dmel.carcass |
| ...all CAGE peaks |  |  |  |  |  |  |  |  |

Table S13: Splice junction validation and evolution (Table_S13_splice_junction_validation.xls).

Key to splicing analysis. The junction identifier is given according to genomic coordinates in *D. melanogaster* (Dmel). This identifier includes the chromosome and position of the first base of the intron on the each side, in 1-based coordinates (and inclusive). The lower coordinate number is always given first. The coordinates are separated by an underscore, with the chromosome at the beginning and the strand at the end, separated by colons. One junction is shown, but there are rows for each junction. Conservation index (CI) and validation results for each species are shown, where not aligned (0), aligned but not used (1), and aligned and used (2) are summarized. Four species are shown here, but there is a column for each species. The validation summary across all species uses the same codes.

| dmel | CI | dsim | dyak | dtak | dbia | … all species | summary |
| --- | --- | --- | --- | --- | --- | --- | --- |
| chr2L:10006418_10006474:+ | 6.258 | 2 | 2 | 2 | 2 | … | 2 |
| … all junctions |  | … | … | … | … | … | … |

Table S14: RNA element validation totals and rates

| MDv2 annotation  RNA elements | | % validated[[5]](#footnote-5) at distance (ss) from *D. melanogaster* | | | | Parameters[[6]](#footnote-6) | | | t1/2[[7]](#footnote-7) | |
| --- | --- | --- | --- | --- | --- | --- | --- | --- | --- | --- |
| Type | # | >0.05 | >0.30 | >0.60 | N0 | | λ | R2 | Myrs[[8]](#footnote-8) | ss |
| GT-AG splice | 63,524 | 87.7 | 80.9 | 68.7 | 79.4 | | 0.4 | 0.95 | 104.1 | 1.67 |
| GC-AG splice | 788 | 70.3 | 58.0 | 41.9 | 58.4 | | 0.7 | 0.93 | 64.7 | 1.03 |
| A-I editing | 972 | 70.2 | 57.7 | 41.6 | 41.1 | | 1.0 | 0.50 | ND[[9]](#footnote-9) | ND |
| AT-AC splice | 118 | 13.6 | 6.4 | 5.9 | 12.2 | | 0.5 | 0.32 | ND | ND |

Table S15: Splicing events (Table_S15_splicing_events.xls)

Key to splicing analysis. Alternative-splicing results for whole adult female vs male. For each pairwise alternative-splicing event, the splicing difference is given in delta PSI (Percent Spliced In) for each species. Unique identifiers for each pairwise defined alternative event (envent_id), FlyBase gene name (gene_id), common abbreviation for gene (gene-name), basic type of alternative event (eventcode), an graph-based classification describing all possible types of alternative events from AStalavista output (structure), and the mutually exclusive splice junctions that compose the event (joinstring) are shown. There are columns for each female/male comparison (PSI value in females minus the PSI value in males, and ranges from -1 to 1). Note that each strain of Dsim is presented separately.

| event_id | gene_id | gene_name | eventcode | structure | joinstring |
| --- | --- | --- | --- | --- | --- |
| ASTA10442 | FBgn0028582 | lqf | altacceptor | 1-,2- | chr3L:7528745_7528983:+;  chr3L:7528745_7529103:+ |
| ... all events |  |  |  |  |  |

Continued header.

| Dmel_deltaPSI | Dsim011_deltaPSI | Dsim198_deltaPSI | Dyak_deltaPSI | … all species |
| --- | --- | --- | --- | --- |
| 0.674 | 0.808 | 0.656 | 0.796 | … |
| … | … | … | … | … |

Table S16: RNA editing validation and evolution (Table_S16_editing_validation.xls).

Key to editing analysis. Chromosome arm (chrom), nt position of edit (position), conservation index (CI) and sample ID are given. One example is shown, but here are columns for each sample and rows for each editing event, where not aligned (0), aligned but not edited (1), and aligned and edited (2) summarize the event.

| chrom | Position (1-based) | CI | Dana_371.13_F_R1 | ... all samples |
| --- | --- | --- | --- | --- |
| chr3L | 8113468 | 0.173 | 0 | .. |
| … all editing events | … |  | … | .. |

###### Table S17: Expression of conserved intergenic regions.

|  | Intergenic regions with K27Ac enrichment | | | | Intergenic regions with CAGE peaks | | | |
| --- | --- | --- | --- | --- | --- | --- | --- | --- |
| Distance (ss) | Expressed | Unexpressed | Ratio | P-value[[10]](#footnote-10) | Expressed | Unexpressed | Ratio | P-value |
| D > 0 | 533 | 1548 | 0.3 |  | 643 | 2672 | 0.2 |  |
| D>0.05 | 496 | 1057 | 0.5 | 3.05E-05** | 587 | 1738 | 0.3 | 1.87E-07** |
| D>0.3 | 370 | 531 | 0.7 | <2.2E-16** | 434 | 765 | 0.6 | <2.2E-16** |
| D>0.6 | 59 | 93 | 0.6 | 5.80E-04** | 52 | 134 | 0.4 | 6.01E-03* |

Files S1 – S8:

CAGE peak data in Browser Extensible Data (BED) format. Fields are specified below and an example shown. This is a standardized format that uses 0-based coordinates. For a description of the data standard for BED, see <http://genome.ucsc.edu/FAQ/FAQformat.html#format1>. A list of available files are shown below.

| Column | Description |
| --- | --- |
| 1 | chromosome |
| 2 | Peak start (0-based coordinates) |
| 3 | Peak end (0-based coordinates) |
| 4 | The orthoDB ID for the protein-coding gene following the CAGE peak |
| 5 | TPM (tags per million) for the CAGE peak |
| 6 | strand |
| 7 | Distance between the CAGE peak and its downstream translation start site. |

Example:

| chr2L | 67043 | 67044 | EOG6STSR2 | 4.01058 | + | 581 |
| --- | --- | --- | --- | --- | --- | --- |

See:

File S1: CAGE peaks in D. melanogaster mixed-sex carcass (File_S1_CAGE_Dmel_FM_carcass.bed)

File S2: CAGE peaks in D. melanogaster ovary (File_S2_CAGE_Dmel_ovary.bed)

File S3: CAGE peaks in D. melanogaster testis, replicate 1 (File_S3_CAGE_Dmel_testis_rep1.bed)

File S4: CAGE peaks in D. melanogaster testis, replicate 2 (File_S4_CAGE_Dmel_testis_rep2.bed)

File S5: CAGE peaks in D. pseudoobscura female carcass (File_S5_CAGE_Dpse_F_carcass.bed)

File S6: CAGE peaks in D. pseudoobscura male carcass (File_S6_CAGE_Dpse_M_carcass.bed)

File S7: CAGE peaks in D. pseudoobscura ovary (File_S7_CAGE_Dpse_ovary.bed)

File S8: CAGE peaks in D. pseudoobscura testis (File_S8_CAGE_Dpse_testis.bed)

1. 95% element coverage at > 1.47 RPKM for exons, introns, and intergenic space. See text and methods for details [↑](#footnote-ref-1)
2. N0 and λ are parameters in the exponential regression line y=N0e-λx for aligned and expressed elements. y: percent aligned and expressed for each element type in each non-*melanogaster* species; x: distance from *D. melanogaster*; N0: percent of aligned and expressed elements in D.mel; λ: the decay constant of percent aligned and expressed; R2: coefficient of determination. [↑](#footnote-ref-2)
3. Time required for percent aligned and expressed to fall to N0/2. [↑](#footnote-ref-3)
4. Years (in millions) based on the estimation of neutral substitution rate in *Drosophila* (see methods). [↑](#footnote-ref-4)
5. At least one junction spanning read for splice junctions following *post hoc* qualitative and quantitative filtering. > 5% of reads for editing. See text and methods for details. [↑](#footnote-ref-5)
6. N0 and λ are parameters in the exponential regression line y=N0e-λx for aligned and expressed elements. y: percent aligned and expressed for each element type in each non-*melanogaster* species; x: distance from *D. melanogaster*; N0: percent of aligned and expressed elements in D.mel; λ: the decay constant of percent aligned and expressed; R2: coefficient of determination. [↑](#footnote-ref-6)
7. Time required for percent aligned and expressed fall to N0/2. [↑](#footnote-ref-7)
8. Years (in millions) based on the estimation of neutral substitution rate in *Drosophila* (See methods). [↑](#footnote-ref-8)
9. Not determined. Validation rate was not exponentially correlated with distance (R2 < 0.6). [↑](#footnote-ref-9)
10. Two-tailed Fisher’s Exact Test (FET). Expression of intergenic region validated in non-*melanogaster* species with distance D>0.05, 0.3 and 0.6 (ss) were compared with expression in any fly species, including *D. melanogaster* (D>=0). *Expressed*: intergenic regions with detected expression in fly species within the specified distance from *D. melanogaster*. *Unexpressed*: intergenic regions aligned to but not expressed in fly species within the specified distance from *D. melanogaster*. *Ratio*: expressed/unexpressed. **P < 0.001. *P < 0.01. [↑](#footnote-ref-10)
